# Supplementary material for: A point mutation in HIV-1 integrase redirects proviral integration into centromeric repeats
Source: PubMed Central journal article supplement (PMC8933506; doi:10.1038/s41467-022-29097-8), 2022-03-18
Supplement: 41467_2022_29097_MOESM1_ESM.pdf [file 41467_2022_29097_MOESM1_ESM.pdf]

## Supplementary information

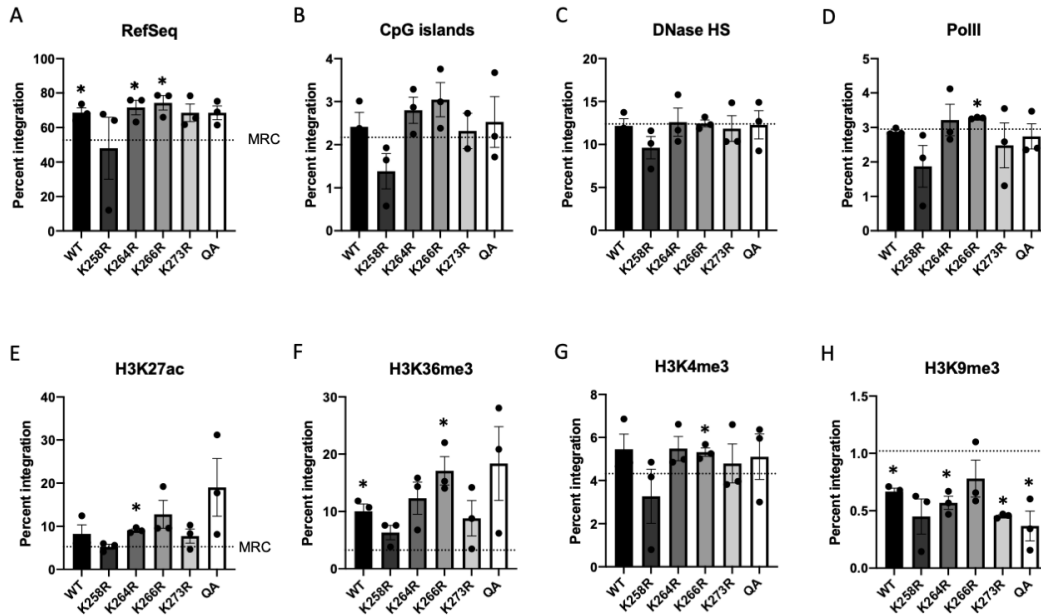

**Figure S1: Integration frequency of WT and acetylation mutant IN proteins with respect to common genomic features.** Frequency of integrations falling within (A) RefSeq genes, or within 1 kb of (B) CpG islands, (C) DNase hypersensitivity sites, (D) RNA polymerase II binding sites and various pre-infection histone modification sites in HeLa cells (E-H) was calculated using BedTools. Frequency of integrations in a matched random control (MRC) data set is shown as dashed line. Data is shown as the average of three independent replicates +/- SEs. Statistical significance of integration frequency relative to MRC was gauged by a one-sample, two tailed t-test (\* $p < 0.05$ , all  $p$ -values shown in Table S3). Source data are provided as a Source Data file.

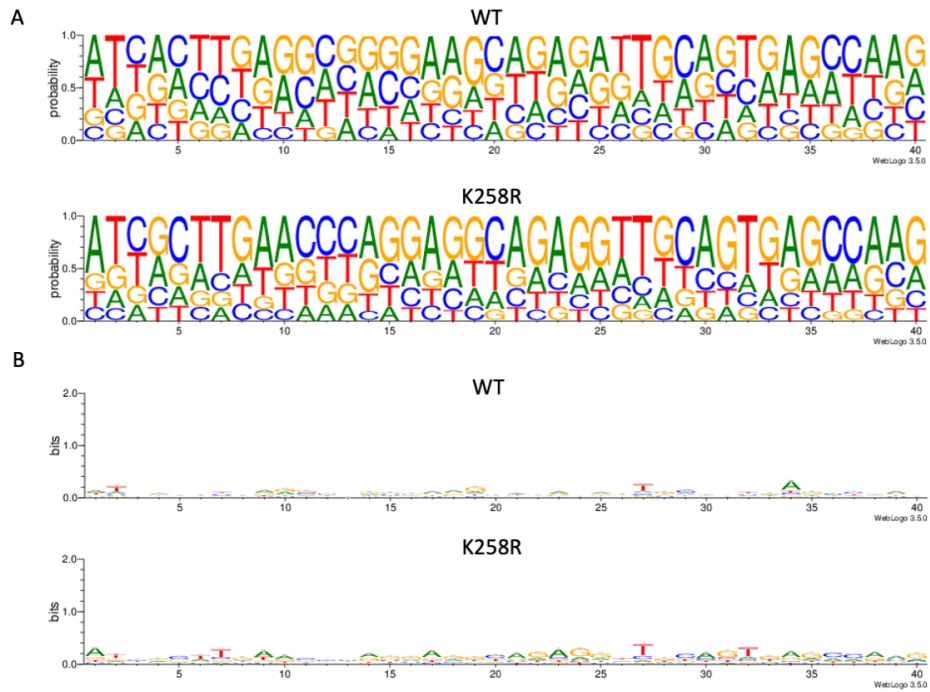

**Figure S2: Consensus sequence around the site of integration for viruses carrying WT or K258R mutant.** Consensus sequence around the site of integration (+/-20 bp) was generated by MEME for integrations generated by WT or K258R IN depicted as (A) probability of nucleotide at each position or (B) as a function of entropy. Cumulative data from three independent biological replicates was used for analysis.

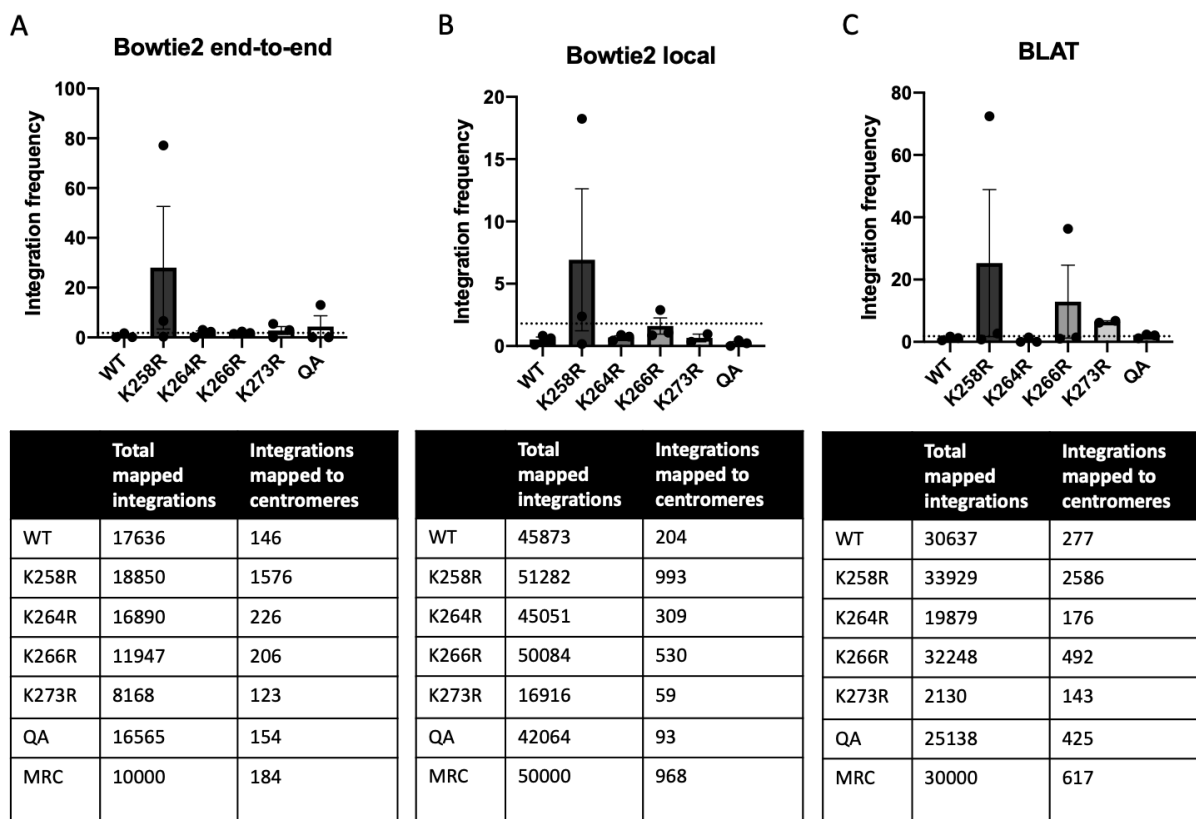

**Figure S3: Integration frequency into centromeres using different mapping algorithms.** NGS data from three independent biological replicates was mapped to the GRCh38 human genome assembly using (A) Bowtie2 end-to-end alignment (shown in main text), (B) Bowtie2 sensitive local alignment or (C) BLAT alignment algorithms. Bar graphs show the integration frequency into centromeres as determined by each algorithm. Graphed data is presented as an average of three independent biological replicates +/- SEs. Absolute number of detected unique integrations for all libraries summed is shown below each graph. Source data are provided as a Source Data file.

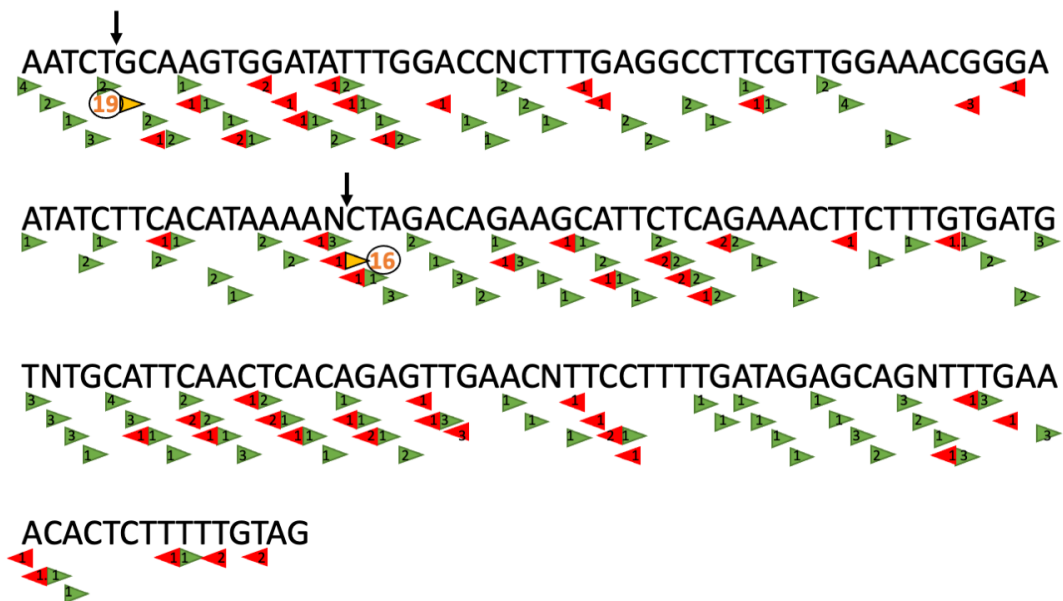

**Figure S4: Schematic depicting integration events into alphoid repeat monomer consensus sequence.** Shown are the exact sites of integration for each unique integration event that mapped to the alphoid repeat sequence from three independent experiments. The number of integrations at each location as well as their orientation is noted. Arrows point to hot-spot locations of integration.

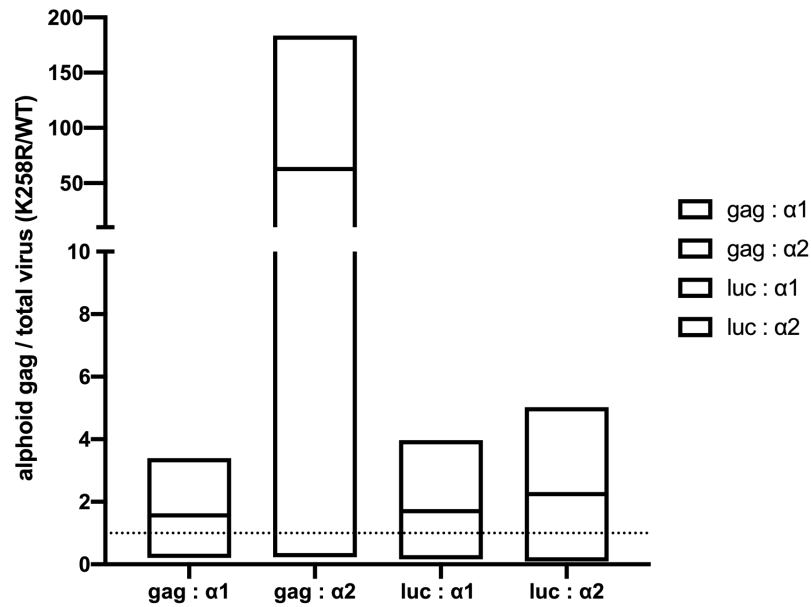

**Fig S5: K258R mutant virus integrates near alphoid repeats more often than WT virus in Jurkat cells.** Integration into centromeric alphoid repeat DNA was quantified using an alphoid-virus nested PCR approach as described in Fig. 5. First round PCR was performed with primers in the alphoid repeat ( $\alpha$ 1,  $\alpha$ 2) and primers in either the 5' end of *gag* or the 3' end of the luciferase reporter gene. Shown are the results of a second round nested quantitative PCR using LTR specific primers normalized to total virus levels. Data from three independent replicates is shown relative to WT as box plots to show the minimum, maximum and mean values. Source data are provided as a Source Data file.

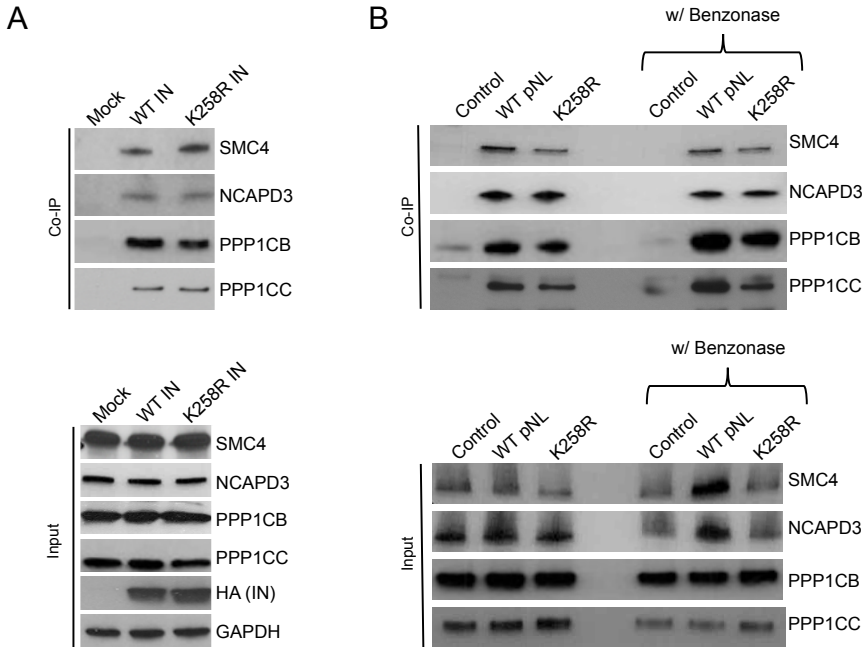

**Figure S6: Validation of candidate host factor binding to WT and K258R mutant IN proteins.** (A) Upper panel: HA-tagged IN proteins were immunoprecipitated from HEK293T cells after transfection with plasmids expressing either WT or K258R mutant IN, or mock transfected. Immunoprecipitated proteins were analyzed by Western blots probed with antisera specific for the indicated candidate host factors. Lower panel: Proteins present in the lysates input to the immunoprecipitation probed with the indicated antisera. (B) Repeat of coimmunoprecipitation as in panel A, performed with addition of benzonase to the lysate to digest RNA and DNA, as indicated. Three independent replicates were performed, representative blots shown. See Source Data for unedited blots.

**Table S1:** Statistical analysis of integration preferences of K258R mutant IN protein as compared to WT (paired t-test or Fisher's exact test, two-tailed, significance level of  $p = 0.05$ ).

|              | Paired t-test (N=3) | Fisher's exact test |
|--------------|---------------------|---------------------|
| RefSeq genes | 0.3247              | <0.0001             |
| TSS          | 0.1691              | <0.0001             |
| CpG islands  | 0.1547              | <0.0001             |
| RNA Pol II   | 0.2656              | 0.0051              |
| DNase HS     | 0.3578              | 0.0006              |
| H3K27ac      | 0.3797              | <0.0001             |
| H3K36me3     | 0.2531              | <0.0001             |
| H3K4me3      | 0.3805              | 0.0025              |
| H3K9me3      | 0.2278              | 0.1847              |
| Centromeric  | 0.3860              | <0.0001             |

**Table S2:** Host proteins immunoprecipitated with WT or K258R mutant IN protein.

| Sample(s)                        | Host protein names                                                                                                                                                                                                                                            |
|----------------------------------|---------------------------------------------------------------------------------------------------------------------------------------------------------------------------------------------------------------------------------------------------------------|
| WT/K258R common binding partners | PRKDC, MDN1, MYBBP1A, NUP205, CAND2, GCN1, NUP188, CKMT1A, IMMT, HEATR1, IPO4, UBE3C, AIFM1, FANCI, ABCD3, ATP2A2, ABCE1, LTN1, SUCLA2, COQ8B, ATAD3C, DDX20, AFG3L2, ATAD3A, ATAD3B, RCN2, SGPL1, TYK2, SLC16A1, MCM7, TIMM50, ARF4, RRP12, PPP1CB, SLC25A10 |
| WT specific binding partners     | TEX10, GEMIN4, UNC45A, YME1L1, ARF5, NOP56, EIF2S2, RPL27                                                                                                                                                                                                     |
| K258R specific binding partners  | NUP93, JAK1, NCAPD3, GLUD1, CHCHD3, SPATA5, CAND1, TMEM209, PLEKHG4, RPP30, HACD3, ILVBL, SMC4, RPSKA4, CAD, ALDH1B1, RPN1, PPP1CC, ATP1A1, HERC5, RTCB                                                                                                       |

**Table S3:** Gene ontology analysis of integrase interacting host factors. GO analysis of either all binding partners, or only specific binding partners was performed for WT and K258R IN proteins.

| <b>GO category</b>                                  | <b># of proteins</b> | <b>P-value</b> | <b>Proteins</b>                                                                                                                                                                          |
|-----------------------------------------------------|----------------------|----------------|------------------------------------------------------------------------------------------------------------------------------------------------------------------------------------------|
| <b><i>WT (all binding partners)</i></b>             |                      |                |                                                                                                                                                                                          |
| Nucleotide binding                                  | 19                   | 5.4E-5         | PRKDC, MDN1, CKMT1A, AIFM1, ABCD3, ATP2A2, ABCE1, SUCLA2, COQ8B, ATAD3C, DDX20, AFG3L2, ATAD3A, ATAD3B, TYK2, MCM7, ARF4, YME1L1, ARF5                                                   |
| <b><i>WT (specific binding partners)</i></b>        |                      |                |                                                                                                                                                                                          |
| rRNA processing                                     | 4                    | 1.7E-3         | TEX10, GEMIN4, NOP56, RPL27                                                                                                                                                              |
| <b><i>K258R (all binding partners)</i></b>          |                      |                |                                                                                                                                                                                          |
| Nucleotide binding                                  | 26                   | 5.2E-8         | JAK1, GLUD1, SPATA5, SMC4, RPS6KA4, CAD, ALDH1B1, ATP1A1, RTCB, PRKDC, MDN1, CKMT1A, AIFM1, ABCD3, ATP2A2, ABCE1, SUCLA2, COQ8B, ATAD3C, DDX20, AFG3L2, ATAD3A, ATAD3B, TYK2, MCM7, ARF4 |
| Antiviral mechanism by IFN-stimulated genes         | 6                    | 2.1E-4         | NUP93, JAK1, HERC5, NUP205, ABCE1, NUP188                                                                                                                                                |
| tRNA processing in the nucleus                      | 5                    | 8.3E-4         | NUP93, RPP30, RTCB, NUP205, NUP188                                                                                                                                                       |
| PTW/PP1 complex                                     | 2                    | 4.9E-2         | PPP1CB, PPP1CC                                                                                                                                                                           |
| <b><i>K258R (specific binding partners)</i></b>     |                      |                |                                                                                                                                                                                          |
| tRNA processing                                     | 3                    | 2.3E-2         | RPP30, RTCB, NUP93                                                                                                                                                                       |
| ISG15 antiviral mechanism                           | 3                    | 4.7E-2         | JAK1, HERC5, NUP93                                                                                                                                                                       |
| Meiotic chromosome condensation / condensin complex | 2                    | 5.2E-3         | NCAPD3, SMC4                                                                                                                                                                             |



**Table S4:** Primer sequences used for quantitative PCR analysis of viral DNA intermediates and transcripts.

| Target          | Primer sequence (5'-3')                             |
|-----------------|-----------------------------------------------------|
| Late RT         | TGTGTGCCCGTCTGTTGTGT<br>GAGTCCTGCGTCGAGAGATC        |
| Luciferase      | CGTCTTCCGTGCTCCAAAAC<br>CAAAGGATATCAGGTGGCCC        |
| 2LTR circles    | AACTAGGGAACCCACTGCTTAAG<br>TCCACAGATCAAGGATATCTTGTC |
| Alu-gag nest 1  | GCCTCCCAAAGTGCTGGGATTACAG<br>GCTCTCGCACCCATCTCTCTCC |
| Alu-gag nest 2  | GCCTCAATAAAGCTTGCCTTGA<br>TCCACACTGACTAAAAGGGTCTGA  |
| <i>Tat</i> mRNA | GTTTGTTCATGACAAAAGCCTTA<br>CTATTCCTTCGGGCCTGTC      |
| Chr1            | GTTCCCTTAGACAGAGCAGATTT<br>CAACGCAGTTTGTGGGAATG     |
| Chr2            | TCGTTGGAAACGGGATTGT<br>CTGCTCTATGAAAGGGACTGTT       |
| Chr4            | CTGTAGTATCTGGAAGTGGACATT<br>GGTCAACTGTGTTCTTTAGG    |
| Chr14           | GATTCGTTGGAAACGGGATTAC<br>AGAAAGATCCACGCCTGTTA      |
| Alphoid-1       | GCAAGGGGATATGTGGACC                                 |
| Alphoid-2       | ACCACCGTAGGCCTGAAAGCAGTC                            |
| 5'-gag          | GCTCTCGCACCCATCTCTCTCC                              |
| 3'-luc          | AGGCCAAGAAGGGCGGAAAG                                |

**Table S5:** Adaptor and primer sequences used for construction of integration site mapping NGS libraries.

| Primer name       | Primer sequence                                                                        |
|-------------------|----------------------------------------------------------------------------------------|
| Adaptor short arm | P-GATCGGAAGAGCAAAAAAAAAAAAAAAAAA                                                       |
| Adaptor long arm  | CAAGCAGAAGACGGCATACGAGATnnnnnnGTGACTGGAGTTCAGACGTGTGCTCTTCCGATC*T                      |
| PCR-1-F           | TGTGACTCTGGTAACTAGAGATCCCTC                                                            |
| PCR-1-R           | CAAGCAGAAGACGGCATACGAGAT                                                               |
| PCR-2-F           | AATGATACGGCGACCACCGAGATCTACACTCTTCCCTACACGACGCTCTCCGA<br>TCTGAGATCCCTCAGACCCTTTTAGTCAG |
| PCR-2-R           | CAAGCAGAAGACGGCATACGAGATnnnnnn                                                         |

nnnnnn denotes a 6-bp unique barcode, P denotes phosphorylation and \* denotes a phosphorothioate bond

**Table S6:** Statistical analysis of integration preferences of WT or mutant IN proteins as compared to a matched random control (one sample two-tailed t-test, significance level of  $p = 0.05$ ).

|              | <b>WT</b> | <b>K258R</b> | <b>K264R</b> | <b>K266R</b> | <b>K273R</b> | <b>QA</b> |
|--------------|-----------|--------------|--------------|--------------|--------------|-----------|
| RefSeq genes | 0.0285    | 0.8183       | 0.0463       | 0.0356       | 0.0885       | 0.058     |
| TSS          | 0.4319    | 0.1111       | 0.0197       | 0.0489       | 0.2596       | 0.0849    |
| CpG islands  | 0.5413    | 0.1959       | 0.1735       | 0.1587       | 0.7776       | 0.6058    |
| RNA Pol II   | 0.3183    | 0.2166       | 0.6193       | 0.0018       | 0.5446       | 0.6232    |
| DNase HS     | 0.8181    | 0.1693       | 0.9057       | 0.8804       | 0.7553       | 0.6058    |
| H3K27ac      | 0.2927    | 0.9830       | 0.0079       | 0.1451       | 0.2675       | 0.1759    |
| H3K36me3     | 0.0336    | 0.1331       | 0.0837       | 0.0304       | 0.2136       | 0.1432    |
| H3K4me3      | 0.2517    | 0.4915       | 0.1764       | 0.0356       | 0.6527       | 0.535     |
| H3K9me3      | 0.0073    | 0.0653       | 0.016        | 0.2742       | 0.0003       | 0.0372    |
| Centromeric  | 0.1580    | 0.3991       | 0.9515       | 0.8294       | 0.598        | 0.6204    |
